1 **Title:** Digital technology as a tool to provide social support to individuals with cancer in low-  
2 and middle-income countries: a scoping review

3 **Running Title:** Digital technology for cancer-related social support in LMICs

4  
5 **Authors:** Hallie Dau, PhD MPH<sup>1,2</sup>, Fazila Kassam MSc HBSc<sup>3</sup>, Beth A. Payne PhD<sup>2,4</sup>, Hana  
6 Miller<sup>2,5</sup>, Gina Ogilvie, MD MSc FCFP DrPH<sup>1,2,6</sup>

7  
8 **Affiliations:** <sup>1</sup> School of Population and Public Health, University of British Columbia, Vancouver,  
9 Canada

10 <sup>2</sup> Women's Health Research Institute, Vancouver, Canada

11 <sup>3</sup> Faculty of Medicine, University of British Columbia, Vancouver, BC, Canada

12 <sup>4</sup> BC Children's Hospital Research Institute, Vancouver, BC, Canada

13 <sup>5</sup> McGill University, Montreal, Canada

14 <sup>6</sup> BC Centre for Disease Control, Vancouver, Canada

15

16

17 **Corresponding author:** Hallie Dau  
18 BC Women's Hospital and Health Centre  
19 Room H203J - 4500 Oak Street  
20 Vancouver, BC, V6H 3N1  
21 (778) 951-5291  
22 Hallie.Dau@cw.bc.ca

23

24 **Funding:** None

25

26 **Conflict of interest:** None

27

28 **Author Contributions:** HD: conceptualization, methodology, writing – original draft preparation;  
29 FK: analysis, writing – original draft preparation, writing – review and editing; BP: writing – review  
30 and editing; HM analysis, writing – review and editing; GO: supervision

31 Abstract (300/300):

32  
33 BACKGROUND: Cancer is a rising cause of morbidity and mortality in low- and middle-income  
34 countries (LMICs). Individuals diagnosed with cancer in LMICs often have limited access to cancer  
35 prevention, diagnosis, and treatment services. Social support after a cancer diagnosis is associated with  
36 positive health outcomes in the long term. Digital technologies, such as the Internet and mobile  
37 phones, could be used to provide support to individuals with cancer in a more accessible way. This  
38 scoping review aims to understand how digital technology is currently being utilized by individuals  
39 with cancer for social support in LMICs.

40  
41 METHODS: Four electronic databases were searched up to June 2024 to identify studies that reported  
42 on the use of digital technology for cancer social support in LMICs. Articles were included if they  
43 were published in English, included adults diagnosed with any type of cancer, and reported the use of  
44 digital technology for social support. Study characteristics, population demographics, and  
45 technological interventions reported were extracted.

46  
47 RESULTS: In all, 15 articles from 12 studies were included in the scoping review. The results were  
48 centralized in four countries, and the most common cancer type reported was breast. Online health  
49 communities, Internet-based resources, mobile applications, and telecommunication were the four  
50 digital technologies reported. Overall, the articles demonstrated that the use of digital technology for  
51 social support can be beneficial for individuals diagnosed with cancer in LMICs.

52  
53 CONCLUSION: There is a limited understanding of how digital technology can be used to support  
54 individuals with cancer in LMICs. Future research is needed to explore how digital technology can be  
55 utilized by underrepresented regions to offer avenues of support for regionally common cancer types

56 such as cervical. Fundamentally, this scoping review highlights the need for additional research on the  
57 use of digital technology to support individuals with a cancer diagnosis in LMICs.

58  
59 Keywords: cancer, digital, technology, low- and middle-income country; support

60  
61  
62

## 63 INTRODUCTION

64 Cancer is rising within low- and middle-income countries (LMICs) with the number of new cases  
65 annually in LMICs rapidly increasing. By 2030, it is anticipated that three-quarters of global cancer-  
66 related deaths will occur in LMICs.(1) In 2022 the Lancet Oncology Commission published a series  
67 highlighting the urgent need to focus on the increasing rates of cancer in Africa, an area that has been  
68 historically understudied.(2) The increase in cancer rates in Africa and similar regions can be attributed  
69 to urbanization, increased exposure to carcinogenic risk factors, an aging population, sedentary  
70 lifestyles, and limited access to cancer prevention, diagnosis, and treatment services.(2, 3) The burden  
71 of cancer in LMICs is a major public health challenge that requires urgent attention and action. Efforts  
72 to address this challenge should focus on improving cancer prevention, early detection, access to  
73 quality care, and risk factor reduction.

74 An opportunity to increase the quality of cancer care lies in sources of global connectivity. As of 2022,  
75 82% of people in low-middle income countries have access to and use the internet.(4) More  
76 importantly, three-quarters of the world's population owns a mobile phone - 49% of people in low-  
77 income countries and 65% of individuals in lower-middle-income countries.(4) With this, the rise of  
78 social media has allowed individuals to connect more easily with one another across the globe. As of  
79 2022, Facebook (2.96 billion users) is the most popular social network followed by YouTube (2.51  
80 billion users) and WhatsApp (2 billion users).(5) The opportunities for connection and healthcare  
81 access offered by technology should be leveraged to increase access to essential health services such  
82 as cancer support. The utilization of technology for cancer support is aligned with the World Health  
83 Organization's prioritization of self-care interventions. As there is currently a global healthcare worker  
84 shortage, self-care interventions, particularly those based in digital technology, allow individuals to

85 actively engage in advancing their own health and well-being in a convenient and cost-effective manner  
86 that reduces the strain on the healthcare system.(6)

87 Prior research has demonstrated that social support soon after a cancer diagnosis is associated with  
88 favorable health outcomes for individuals with cancer in the long term.(7, 8) Additionally, social  
89 support positively influences a patient's help-seeking behavior.(9) Unfortunately, in many LMICs,  
90 social support is often lacking due to stigma related to diagnosis, poor health system infrastructure,  
91 and gender discrimination.(9) Digital technologies such as mobile phones and the internet offer the  
92 opportunity for cancer patients in LMICs to receive social support in a more accessible way. Prior  
93 research has demonstrated that online cancer communities can decrease psychological distress,(10, 11)  
94 improve support,(12, 13) and create feelings of empowerment.(14-16) To date, there is a large scale  
95 of evidence on the benefits of digital support for individuals with cancer.(17-20) However, there is  
96 limited knowledge about how social support interventions could be applied to individuals with cancer  
97 in LMICs. It is important to better understand how digital technologies can improve access to social  
98 support and ultimately improve cancer outcomes in LMICs. As the rates of cancer continue to rise in  
99 LMICs, the urgent need to address the lack of comprehensive cancer social support programs is  
100 amplified. The goal of this scoping review is to understand how digital technology is currently being  
101 utilized by individuals with cancer for social support in LMICs.

## 102 METHODS

### 103 *Inclusion & exclusion criteria*

104 Articles were included in the review if they (i) were published in English; (ii) were conducted in a  
105 LMIC (as defined by to the World Bank criteria);(21) (iv) included adults ( $\geq 18$  years of age) diagnosed  
106 with any type of cancer; and (v) reported the use of digital technology for cancer social support.

107 Articles were excluded from the review if they (i) focused solely on children; and (ii) were review  
108 articles.

### 109 *Search strategy & extraction*

110 The electronic databases, MEDLINE, PsychInfo, CINAHL, and CABI Global Health were searched  
111 up to June 2024 to identify eligible studies. Search terms are provided in **Supplementary 1**. Covidence  
112 systematic review software(22) was used to screen and extract all data from the included studies. Two  
113 reviewers independently screened studies and one author extracted data from included studies. Studies  
114 were first screened by title and abstract, subsequently, included studies underwent full-text review.  
115 The relevant data was extracted from the final included studies. Disagreements were discussed by the  
116 study team and resolved by reaching consensus.

117 The study population characteristics extracted by the authors included age, gender, education status,  
118 employment status, marital status, income, cancer stage, cancer type, and treatment type, when  
119 applicable. In addition, the type of digital technology utilized was also extracted. Following extraction,  
120 the data was grouped by the type of digital technology reported. The digital technology was compared  
121 and contrasted with regards to its usability and reported outcomes.

122 Social support was based on Cooke et al. and defined as “any emotional, informational, instrumental  
123 or appraisal support given to cancer survivors or patients to help them cope with biological,  
124 psychological or social stressors.”(23) The definition for digital health technology is based on the  
125 World Health Organization’s definition for digital health which defines it as “the use of information  
126 and communications technology in support of health and health-related fields.”(24) Digital health  
127 technology includes web-based resources, mobile applications, social media platforms, general internet  
128 use, and telecommunication.

## 129 RESULTS

130 In all, 7848 original articles were identified through the search strategy and 15 were included in the  
131 final review (**Figure 1**). Three articles were from the same larger study and were combined into one  
132 study, resulting in 12 unique studies.(25-27) **Table 1** summarizes the characteristics of the included  
133 studies. The majority of included studies were either cross-sectional(28-33) (n=6) in design or a  
134 randomized control trial(25-27, 34-36) (n=4). All but one article(26) used quantitative methods.  
135 Among the 12 unique studies included in this review, only four countries were studied: China(37) (25-  
136 27, 29, 32-34, 36, 38) (n=8), Iran(30, 35) (n=2), Kenya(31) (n=1), and Serbia(28) (n=1). Breast(25-27,  
137 29, 31, 37, 38) (n=5) was the most common cancer studied.

138 There were four primary types of digital technologies reported for cancer social support in the 15  
139 included studies: online health communities, Internet-based resources, mobile applications, and  
140 telecommunication.

141 Cross-sectional studies by Zhou et al. and Lei et al. investigated the role of online health communities  
142 (OHCs). Zhou et al. conducted a cross-sectional survey among 162 participants engaged in OHCs in  
143 China. They found that e-health literacy was positively associated with the informational and  
144 emotional support a cancer survivor received by actively interacting in the OHC.(33) Lei et al. (2021)  
145 conducted a social network analysis of user activity and user-generated content in three forums and  
146 found that while a few members of the community are very well connected with many other members,  
147 most other members have fewer connections. Salient topics across all three forums were related to  
148 disease treatment, examination, diagnosis, social life, and healthy behavior change.

149 Three studies reported on Internet-based resources for cancer social support. The first, Shaikh et al.,  
150 developed a website to address the unmet needs, including social support, for women with metastatic  
151 breast cancer in Kenya.(31) Over a two-year period, the website received 7,864 unique visitors. Among

152 the 114 women with metastatic breast cancer they interviewed during their needs assessment, 90.4%  
153 had moderate to high supportive care needs, with psychological being the highest (63%). Given the  
154 high need for social support, the authors concluded that interactive Internet-based resources could be  
155 useful for women living with metastatic breast cancer in countries with limited health services.(31)  
156 Salajegheh et al.(30) and Wang(32) were both cross-sectional studies that surveyed individuals with  
157 cancer about their Internet usage. Salajegheh et al. reported that among the 350 individuals with cancer  
158 that they surveyed, the Internet was one of the least likely ways individuals sought out information.(30)  
159 Wang surveyed pancreatic cancer internet users and found that social media use has a positive impact  
160 on mental health, namely anxiety and depression.(32)

161 Five unique studies, all conducted in China, reported on the use of mobile applications for cancer  
162 support. (26, 27, 34, 36, 38, 39) Chen et al, Wang et al., and Wu et al. evaluated ways WeChat, a Chinese  
163 social media and messaging application, could be used to help support individuals with cancer in  
164 China.(36-38) All three interventions provided information and support through the mobile  
165 application. Wang et al. included the WeChat platform as well as a micro-website developed by the  
166 researchers,(36) Wu et al. recruited nurses to lead and interact with participants through the platform,  
167 (38) and Chen et al. developed an interactive platform.(37) At the end of the study period, both Wang  
168 et al. and Wu et al. reported that those in the WeChat group had higher psychological well-being than  
169 those in the control.(36, 38) Additionally, Wang et al. and Chen et al. reported improved quality of  
170 life by the end of the study period.(36, 37) For example, in Wang et al. the quality of life score (range  
171 0-100) improved from 51.1 in the pre-intervention to 63.1 in the post-intervention.(36) Wu et al.  
172 reported that those who received the intervention reported a higher level of social support outside of  
173 family.(38)



174 Both Zhu et al. (25-27) and Lin et al.(34) measured participant’s self-efficacy after using a mobile  
175 application created by the study team. Both applications include a discussion forum for participants  
176 to engage in. Zhu et al. found that the program improved emotional well-being,(26) self-efficacy,(27)  
177 quality of life, (27) and social support among individuals with breast cancer. (27) Lin et al. found that  
178 individuals with gynecological cancer in the intervention group had lower levels of illness uncertainty  
179 and higher quality of life levels.(34)

180 Two studies reported on the use of telecommunications.(28, 30, 35) Klikovac established a telephone  
181 service to provide psychological support to cancer patients of all types and stages, as well as their  
182 family members in Serbia. They found that most of the calls were regarding emotional support for  
183 sadness, hopelessness, depression and informational support for disease prognosis, treatment, and  
184 side effects of treatment.(28) Rahimi et al. conducted a double-blind randomized control trial to  
185 explore how peer support via telephone and social networks impacts colorectal cancer patients. They  
186 reported that participants who received informational, emotional, and appraisal support from their  
187 peers via telephone two times a week and virtual social networks three times a week had overall higher  
188 well-being than the control group.(35)

## 189 DISCUSSION

190 In all, 15 articles and 12 studies were included in this scoping review. The majority of the studies were  
191 conducted in China. Online health communities, Internet-based resources, mobile applications, and  
192 telecommunication were the four primary types of digital technology utilized for cancer social support.  
193 Overall, the review found that the use of digital technology for social support can be beneficial for  
194 individuals diagnosed with cancer in LMICs. More specifically, we found that digital technology can  
195 improve quality of life, reduce anxiety and depression, and allow individuals to connect with other  
196 individuals diagnosed with cancer.

197 Only four countries were represented in this review. The majority of the included studies were from  
198 China,(37) (25-27, 29, 32-34, 36, 38) a country that has the most internet users worldwide,(40) as well  
199 as the second highest gross-domestic product globally.(41) There was only one study from the African  
200 region (Kenya)(31) and no research from South America and Central Asia. This likely is because cancer  
201 and other non-communicable diseases have largely been understudied in LMICs with the primary  
202 focus being on communicable diseases.(2, 42) As such, there is a gap in understanding how digital  
203 technology can be used effectively to provide social support for cancer patients across the broad  
204 category of LMICs. It is important to study this topic more widely since many LMICs are similar in  
205 that they lack robust healthcare systems that can adequately care for all the physical and social needs  
206 of individuals diagnosed with cancer. (1, 3, 43) More widespread and varied research on digital  
207 platforms can better lead to the adaptation and adoption of programs across more resource-limited  
208 countries. Social support through digital technology could reduce the overall burden of care on the  
209 local healthcare system.

210 Similar to a deficiency in the regions studied, there is a limited understanding of how digital technology  
211 can support various cancer types. The majority of the included studies reviewed breast cancer.  
212 However, the top five types of cancer in LMICs are breast, cervical, liver, colorectal, and lip/oral.(44)  
213 Given these cancers differ in their treatment of care, the way in which technology can be used for  
214 social support may differ as well. Evidently, cancers associated with significant morbidity and mortality  
215 in LMICs such as cervical(45) have not been the focus of digital health interventions and thus, current  
216 evidence may not be applicable to all cancer patients from these regions. Therefore, there needs to be  
217 a greater understanding of how digital technology can best provide social support for not only a variety  
218 of cancer types, but those most common to LMICs.

219 The results of this review demonstrate that despite the surging cases of cancer in LMICs, there has  
220 been limited exploration of the opportunities to provide social support to individuals with cancer  
221 using digital technologies. More specifically, there is a need to better understand how existing and  
222 commonly utilized technological interventions can be implemented for cancer social support in  
223 LMICs. To date, the majority of research has focused on mobile applications followed by general  
224 Internet use. This is only a small fraction of what could be harnessed to support individuals with  
225 cancer in LMICs. For example, with regards to social media, WeChat is the only platform that has  
226 been studied for digital social support for individuals with cancer in LMICs.(38) However, WeChat is  
227 designed primarily for Chinese users and as such the findings are not applicable to other countries.  
228 Consequently, there is an urgent need for research on how the more commonly used and growing  
229 platforms like WhatsApp, Facebook, and YouTube can be adapted for digital social support for cancer  
230 patients in LMICs. For example, research from the United States and Australia has shown that social  
231 media can provide positive social support benefits for individuals diagnosed with cancer(46, 47) and  
232 that there is an interest in it, particularly among young adults with cancer.(47-49) Replicating these  
233 findings in an LMIC setting should be a research priority.

234 This scoping review was strengthened by its comprehensive search strategy that, in turn, identified  
235 multiple gaps in relation to the use of digital technology for social support for individuals diagnosed  
236 with cancer in LMICs. Additionally, the review adhered to best practices to reduce bias in results and  
237 included two authors to review potential articles. This review was limited in that the authors only  
238 searched for studies published in English. As such, publication bias may have occurred.

239 Furthermore, the authors did not consider unpublished or grey literature which may have provided  
240 additional results.

241 Despite the vast advancements in technology, there is limited evidence for its use to deliver social  
242 support to cancer patients in LMICs. Only 12 studies were identified in this scoping review, and they  
243 were limited to four countries, the majority being China. Future research should consider including  
244 more nations in underrepresented regions, cancer types that carry the greatest burden in LMICs, and  
245 widely used and acceptable digital platforms. Furthermore, longitudinal studies are needed to  
246 determine how long the benefits of digital technology last after a diagnosis. As individuals continue to  
247 spend increasing amounts of time in the digital space, it is important for the cancer community to  
248 focus their attention on harnessing this technology for better support and overall care. This in turn  
249 will help reduce the burden of care on local healthcare systems and lead to more positive health  
250 outcomes for individuals diagnosed.  
251

## REFERENCES

- 252  
253
- 254 1. Pramesh C, Badwe RA, Bhoo-Pathy N, Booth CM, Chinnaswamy G, Dare AJ, et al.  
255 Priorities for cancer research in low-and middle-income countries: a global perspective. *Nature*  
256 *Medicine*. 2022;28(4):649-57.
  - 257 2. Ngwa W, Addai BW, Adewole I, Ainsworth V, Alaro J, Alatise OI, et al. Cancer in sub-  
258 Saharan Africa: a Lancet Oncology Commission. *The Lancet Oncology*. 2022;23(6):e251-e312.
  - 259 3. Shah SC, Kayamba V, Peek Jr RM, Heimbürger D. Cancer control in low-and middle-  
260 income countries: is it time to consider screening? *Journal of global oncology*. 2019;5:1-8.
  - 261 4. International Telecommunication Union. *Measuring digital development: Facts and*  
262 *Figures 2022*. 2022.
  - 263 5. Statista. Most popular social networks worldwide as of January 2023, ranked by  
264 number of monthly active users 2023 [Available from:  
265 <https://www.statista.com/statistics/272014/global-social-networks-ranked-by-number-of-users/>.
  - 266 6. World Health Organization. Self-care interventions for health 2022 [Available from:  
267 <https://www.who.int/news-room/fact-sheets/detail/self-care-health-interventions>.
  - 268 7. Ruiz-Rodríguez I, Hombrados-Mendieta I, Melguizo-Garín A, Martos-Méndez MJ. The  
269 Importance of Social Support, Optimism, and Resilience on the Quality of Life of Cancer  
270 Patients. *Frontiers in Psychology*. 2022:634.
  - 271 8. Schroevers MJ, Helgeson VS, Sanderman R, Ranchor AV. Type of social support matters  
272 for prediction of posttraumatic growth among cancer survivors. *Psycho-Oncology*.  
273 2010;19(1):46-53.
  - 274 9. McCutchan G, Weiss B, Quinn-Scoggins H, Dao A, Downs T, Deng Y, et al.  
275 Psychosocial influences on help-seeking behaviour for cancer in low-income and lower middle-  
276 income countries: a mixed-methods systematic review. *BMJ global health*. 2021;6(2):e004213.
  - 277 10. Rodgers S, Chen Q. Internet Community Group Participation: Psychosocial Benefits for  
278 Women with Breast Cancer. *Journal of Computer-Mediated Communication*. 2017;10(4).
  - 279 11. Adikari A, de Silva D, Ranasinghe WKB, Bandaragoda T, Alahakoon O, Persad R, et al.  
280 Can online support groups address psychological morbidity of cancer patients? An artificial  
281 intelligence based investigation of prostate cancer trajectories. *PLOS ONE*.  
282 2020;15(3):e0229361.
  - 283 12. Sillence E. Giving and receiving peer advice in an online breast cancer support group.  
284 *Cyberpsychology, Behavior, and Social Networking*. 2013;16(6):480-5.
  - 285 13. van Eenbergen MC, van de Poll-Franse LV, Krahmer E, Verberne S, Mols F. Analysis of  
286 Content Shared in Online Cancer Communities: Systematic Review. *JMIR Cancer*. 2018;4(1):e6-  
287 e.
  - 288 14. Tjørnhøj-Thomsen T. Online interaction. Effects of storytelling in an internet breast  
289 cancer support group. 2008.
  - 290 15. van Uden-Kraan CF, Drossaert CHC, Taal E, Shaw BR, Seydel ER, van de Laar MAFJ.  
291 Empowering Processes and Outcomes of Participation in Online Support Groups for Patients  
292 With Breast Cancer, Arthritis, or Fibromyalgia. *Qual Health Res*. 2008;18(3):405-17.
  - 293 16. Sharf BF. Communicating Breast Cancer On-Line: Support and Empowerment on the  
294 Internet. *Women & Health*. 1997;26(1):65-84.
  - 295 17. Pyle D, Perry A, Lamont-Mills A, Tehan G, Chambers SK. A scoping review of the  
296 characteristics and benefits of online prostate cancer communities. *Psycho-Oncology*.  
297 2021;30(5):659-68.

- 298 18. Setoyama Y, Yamazaki Y, Namayama K. Benefits of peer support in online Japanese  
299 breast cancer communities: differences between lurkers and posters. *Journal of medical Internet*  
300 *research*. 2011;13(4):e122.
- 301 19. Chung JE. Social Networking in Online Support Groups for Health: How Online Social  
302 Networking Benefits Patients. *Journal of Health Communication*. 2014;19(6):639-59.
- 303 20. Vilhauer RP. Perceived Benefits of Online Support Groups for Women with Metastatic  
304 Breast Cancer. *Women & Health*. 2009;49(5):381-404.
- 305 21. World Bank. Low & middle income | Data 2020 [Available from:  
306 <https://data.worldbank.org/country/XO>].
- 307 22. Covidence systematic review software. Melbourne, Australia: Veritas Health Innovation;  
308 2021.
- 309 23. Cooke BD, Rossmann MM, McCubbin HI, Patterson JM. Examining the definition and  
310 assessment of social support: A resource for individuals and families. *Family relations*.  
311 1988;211-6.
- 312 24. World Health Organization. Global diffusion of eHealth: making universal health  
313 coverage achievable: report of the third global survey on eHealth: World Health Organization;  
314 2017.
- 315 25. Zhu H, Chen X, Yang J, Wu Q, Zhu J, Chan SW-C. Mobile breast cancer e-support  
316 program for Chinese women with breast cancer undergoing chemotherapy (part 3): Secondary  
317 data analysis. *JMIR mHealth and uHealth*. 2020;8(9).
- 318 26. Zhu J, Ebert L, Guo D, Yang S, Han Q, Chan SW-C. Mobile Breast Cancer e-Support  
319 Program for Chinese Women With Breast Cancer Undergoing Chemotherapy (Part 1):  
320 Qualitative Study of Women's Perceptions. *JMIR mHealth and uHealth*. 2018;6(4):e85.
- 321 27. Zhu J, Ebert L, Liu X, Wei D, Chan SW-C. Mobile Breast Cancer e-Support Program for  
322 Chinese Women With Breast Cancer Undergoing Chemotherapy (Part 2): Multicenter  
323 Randomized Controlled Trial. *JMIR mHealth and uHealth*. 2018;6(4):e104.
- 324 28. Klikovac T. The First Telephone Line for the Psychological Support to Oncological  
325 Patients and Their Family Members in Serbia. *Srpski arhiv za celokupno lekarstvo*. 2015;143(11-  
326 12):726-30.
- 327 29. Lei Y, Xu S, Zhou L. User Behaviors and User-Generated Content in Chinese Online  
328 Health Communities: Comparative Study. *Journal of medical Internet research*.  
329 2021;23(12):e19183.
- 330 30. Salajegheh M, Moazed V, Janati Z, Esmaeeli K. Studying health information behaviors  
331 of people with cancer. *International Archives of Health Sciences*. 2020;7(1):31-6.
- 332 31. Shaikh AJ, Dhillon N, Shah J, Kathomi C, Kiragu A, Asirwa FC, et al. Supporting  
333 Kenyan women with advanced breast cancer through a network and assessing their needs and  
334 quality of life. *Supportive care in cancer : official journal of the Multinational Association of*  
335 *Supportive Care in Cancer*. 2022;30(2):1557-67.
- 336 32. Wang Y, Bao S, Chen Y-b. How does social media use influence the mental health of  
337 pancreatic cancer patients: a chain mediating effect of online social support and psychological  
338 resilience. *Frontiers in Public Health*. 2023;11(June).
- 339 33. Zhou J, Wang C. Improving cancer survivors' e-health literacy via online health  
340 communities (OHCs): A social support perspective. *Journal of Cancer Survivorship*.  
341 2020;14(2):244-52.

- 342 34. Lin H, Ye M, Lin Y, Chen F, Chan S, Cai H, et al. Mobile App for Gynecologic Cancer  
343 Support for Patients With Gynecologic Cancer Receiving Chemotherapy in China: Multicenter  
344 Randomized Controlled Trial. *J Med Internet Res*. 2023;25:e49939.
- 345 35. Rahimi M, Mahdizadeh M, Chamanzari H, Mahdizadeh S-M. The Effect of Peer Support  
346 with Telecommunication on Subjective Well-being in Colorectal Patients: A Randomized  
347 Controlled Clinical Trial. *International Journal of Community Based Nursing & Midwifery*.  
348 2021;9(2):127-38.
- 349 36. Wang Y, Yang L, Xu W, Wang C, Chen J, Wu Y, et al. Effects of a WeChat-based  
350 multimodal psychoeducational intervention on psychological well-being and quality of life in  
351 acute leukaemia patients in China: a randomised controlled trial. *Journal of cancer survivorship* :  
352 research and practice. 2022;16(6):1461-77.
- 353 37. Chen X, Chaimongkol N, Hengudomsub P. Effects of a Phone-Based Support Program  
354 for Women With Breast Cancer Undergoing Chemotherapy: A Pilot Study. *SAGE Open Nurs*.  
355 2024;10:23779608241231176.
- 356 38. Wu Q, Kue J, Zhu X, Yin X, Jiang J, Chen J, et al. Effects of Nurse-Led Support Via  
357 WeChat, a Smartphone Application, for Breast Cancer Patients After Surgery: A Quasi-  
358 Experimental Study. *Telemedicine journal and e-health : the official journal of the American*  
359 *Telemedicine Association*. 2020;26(2):226-34.
- 360 39. Zhu J, Ebert L, Zhimin X, Qu S, Chan SW-C, Zhu J, et al. Development of a mobile  
361 application of Breast Cancer e-Support program for women with breast cancer undergoing  
362 chemotherapy. *Technology & Health Care*. 2017;25(2):377-82.
- 363 40. Statista. Countries with the largest digital populations in the world as of January 2023  
364 2023 [Available from: [https://www.statista.com/statistics/262966/number-of-internet-users-in-](https://www.statista.com/statistics/262966/number-of-internet-users-in-selected-countries/)  
365 [selected-countries/](https://www.statista.com/statistics/262966/number-of-internet-users-in-selected-countries/)].
- 366 41. The World Bank. GDP (current US\$) 2024 [Available from:  
367 [https://data.worldbank.org/indicator/NY.GDP.MKTP.CD?most\\_recent\\_value\\_desc=true](https://data.worldbank.org/indicator/NY.GDP.MKTP.CD?most_recent_value_desc=true)].
- 368 42. Rubagumya F, Carson L, Mushonga M, Manirakiza A, Murenzi G, Abdihamid O, et al.  
369 An analysis of the African cancer research ecosystem: tackling disparities. *BMJ Glob Health*.  
370 2023;8(2).
- 371 43. Organization WH. Tracking universal health coverage: 2017 global monitoring report.  
372 2017.
- 373 44. International Agency for Research on Cancer. Low middle income. World Health  
374 Organization,; 2021.
- 375 45. Sung H, Ferlay J, Siegel RL, Laversanne M, Soerjomataram I, Jemal A, et al. Global  
376 cancer statistics 2020: GLOBOCAN estimates of incidence and mortality worldwide for 36  
377 cancers in 185 countries. *CA: a cancer journal for clinicians*. 2021;71(3):209-49.
- 378 46. Kashian N, Jacobson S. Factors of Engagement and Patient-Reported Outcomes in a  
379 Stage IV Breast Cancer Facebook Group. *Health Communication*. 2020;35(1):75-82.
- 380 47. Lazard AJ, Collins MKR, Hedrick A, Varma T, Love B, Valle CG, et al. Using Social  
381 Media for Peer-to-Peer Cancer Support: Interviews With Young Adults With Cancer. *JMIR*  
382 *Cancer*. 2021;7(3):e28234.
- 383 48. Donovan E, Martin SR, Seidman LC, Zeltzer LK, Cousineau TM, Payne LA, et al. The  
384 Role of Social Media in Providing Support from Friends for Adolescent and Young Adult  
385 (AYA) Patients and Survivors of Sarcoma: Perspectives of AYA, Parents, and Providers. *J*  
386 *Adolesc Young Adult Oncol*. 2021;10(6):720-5.

387 49. McNeil R, Egdsdal M, Drew S, McCarthy MC, Sawyer SM. The changing nature of social  
388 support for adolescents and young adults with cancer. *European Journal of Oncology Nursing*.  
389 2019;43:101667.  
390



**Table 1.** Characteristics of included studies

| <b>Author</b>         | <b>Year</b> | <b>Country</b> | <b>Study Type</b>                        | <b>Sample Size</b>                     | <b>Cancer Type</b> | <b>Digital technology utilized</b>                     |
|-----------------------|-------------|----------------|------------------------------------------|----------------------------------------|--------------------|--------------------------------------------------------|
| Chen et al.(37)       | 2024        | China          | Pre-test-post-test                       | 20                                     | Breast             | Mobile application                                     |
| Klikovac(28)          | 2015        | Serbia         | Cross-sectional                          | 2,748                                  | Multiple cancers   | Telephone                                              |
| Lei et al.(29)        | 2021        | China          | Cross-sectional                          | Not reported                           | Lung, Breast       | Online health community                                |
| Lin et al.(34)        | 2023        | China          | Randomized control trial                 | 168                                    | Gynecologic        | Mobile application                                     |
| Rahimi et al.(35)     | 2021        | Iran           | Randomized control trial                 | 60                                     | Colorectal         | Telephone and virtual social networks                  |
| Salajegheh et al.(30) | 2020        | Iran           | Cross-sectional                          | 350                                    | Multiple cancers   | Internet, social networks, telephone, satellite, radio |
| Shaikh et al.(31)     | 2021        | Kenya          | Cross-sectional                          | 114                                    | Breast             | Internet                                               |
| Wang(36)              | 2022        | China          | Randomized control trial                 | 72                                     | Leukemia           | Mobile application                                     |
| Wang(32)              | 2023        | China          | Cross-sectional                          | 425                                    | Pancreatic         | Internet, social networks                              |
| Wu et al.(38)         | 2020        | China          | Quasi-experimental                       | 60                                     | Breast             | Mobile application                                     |
| Zhou et al.(33)       | 2020        | China          | Cross-sectional                          | 162                                    | Multiple cancers   | Online health community                                |
| Zhu et al.(25-27)     | 2018        | China          | Qualitative,<br>Randomized control trial | 13 (qualitative)<br>114 (quantitative) | Breast             | Mobile application                                     |

391 Figure 1. PRISMA flow diagram

392  
393  
394  
395  
396  
397  
398  
399  
400  
401  
402  
403  
404  
405  
406  
407  
408  
409  
410  
411  
412  
413  
414  
415  
416  
417  
418  
419  
420  
421  
422  
423  
424  
425  
426  
427

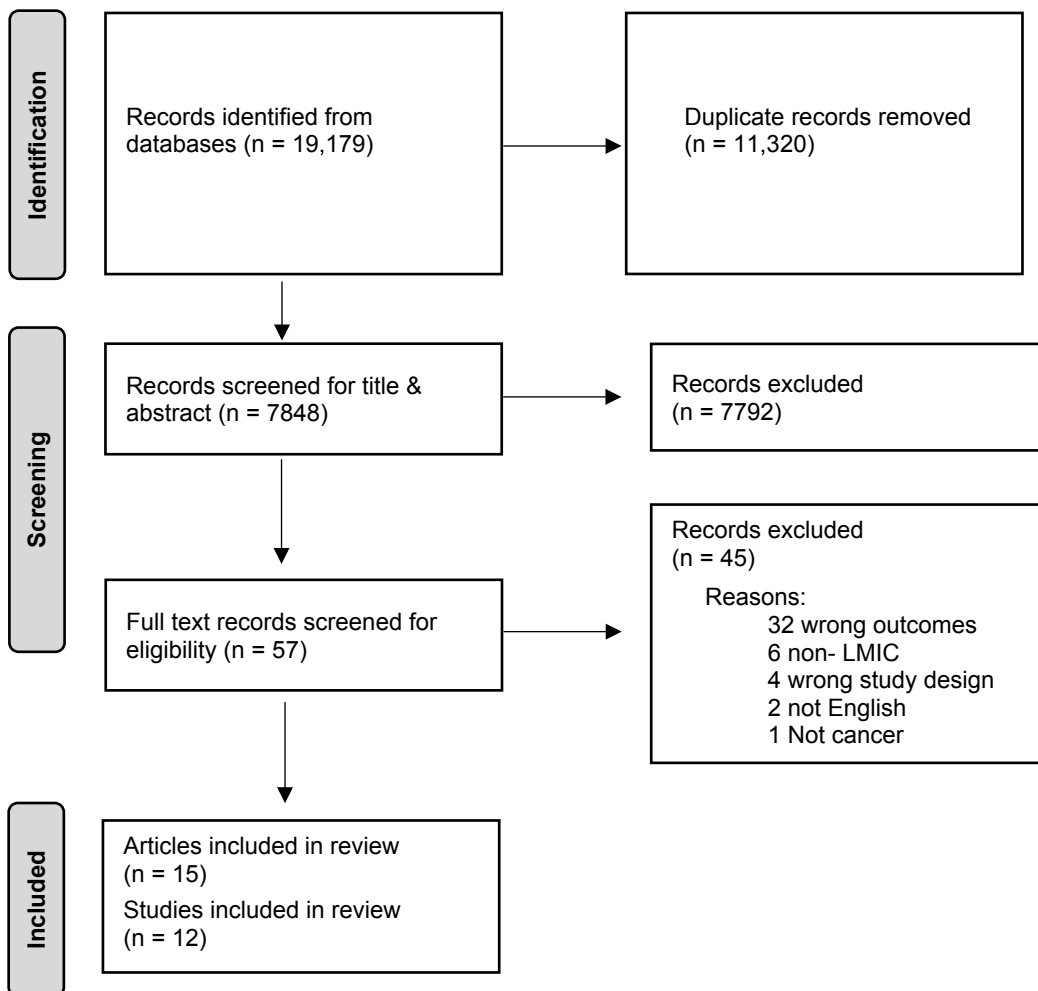

Source: https://medrxiv.org/content/10.1101/2024.08.09.24311634.full.pdf
